# Supplementary material for: Sugar additive with a halogen group enabling a highly reversible and dendrite-free Zn anode
Source: Royal Society of Chemistry journal article supplement (doi:10.1039/d4re00366g), 2024-10-29
Supplement: d4re00366g1.pdf [file d4re00366g1.pdf]

## Supporting Information for

### Sugar additive with halogen group enabling highly reversible and dendrite-free Zn anode

Weihaio Xu <sup>a,b</sup>, Xipo Ma <sup>a,b</sup>, Pengbo Lyu<sup>c</sup>, Zhenren Gao<sup>d</sup>, Chunshuang Yan,<sup>\*a,b</sup> and Chade Lv <sup>\*a,b</sup>

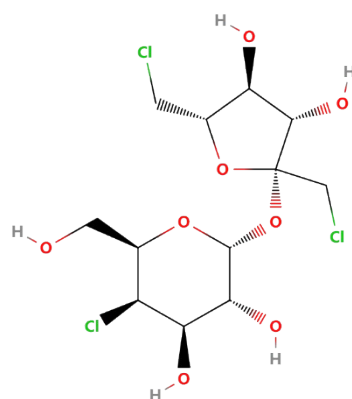

Fig. S1. Schematic diagram of the molecular structure of sucralose.

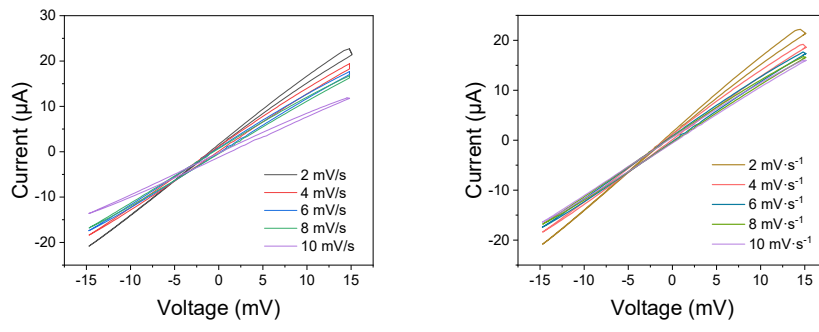

Fig. S2. CV curves of Zn//Zn symmetric cells in ZSO electrolyte (left) and SRL electrolyte (right) at different scan rate.

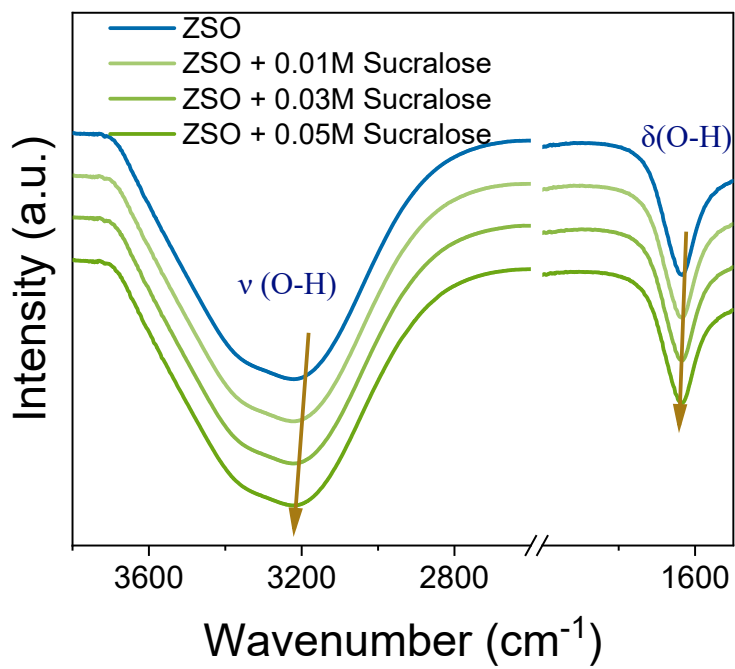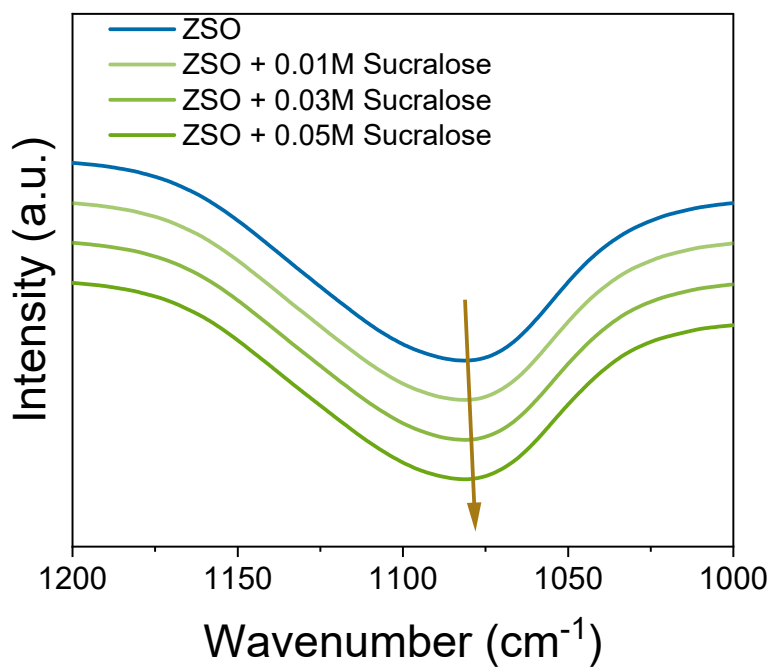

Fig. S3. FTIR spectra for different electrolytes: O-H stretching; O-H bending; and SO<sub>4</sub><sup>2-</sup> vibration.

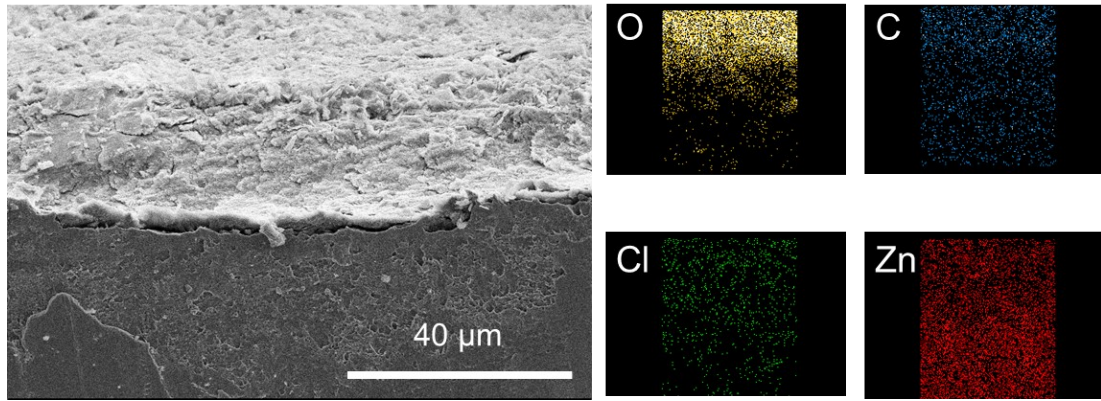

Fig. S4. SEM and EDS images of Zn anodes after cycling in SRL electrolyte.



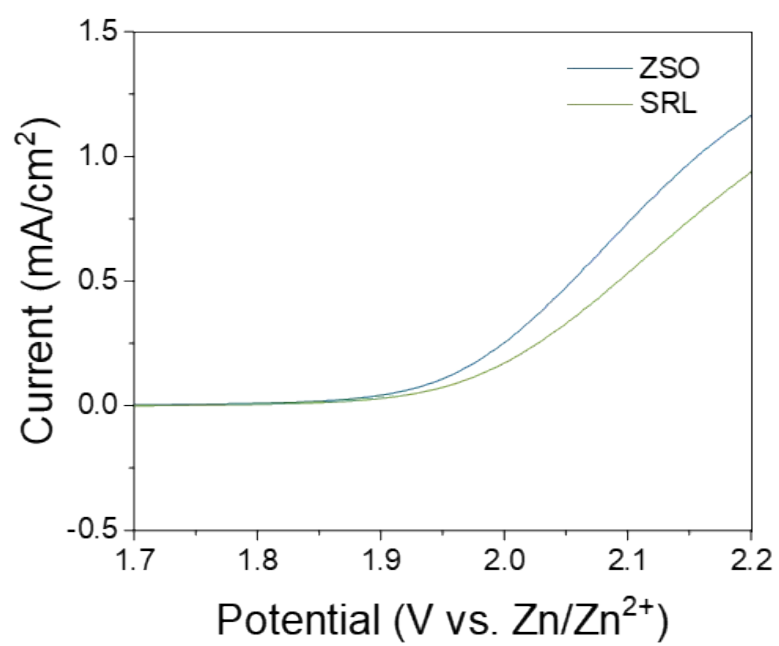

Fig. S5. Linear polarization curves measured in ZSO and SRL electrolytes.

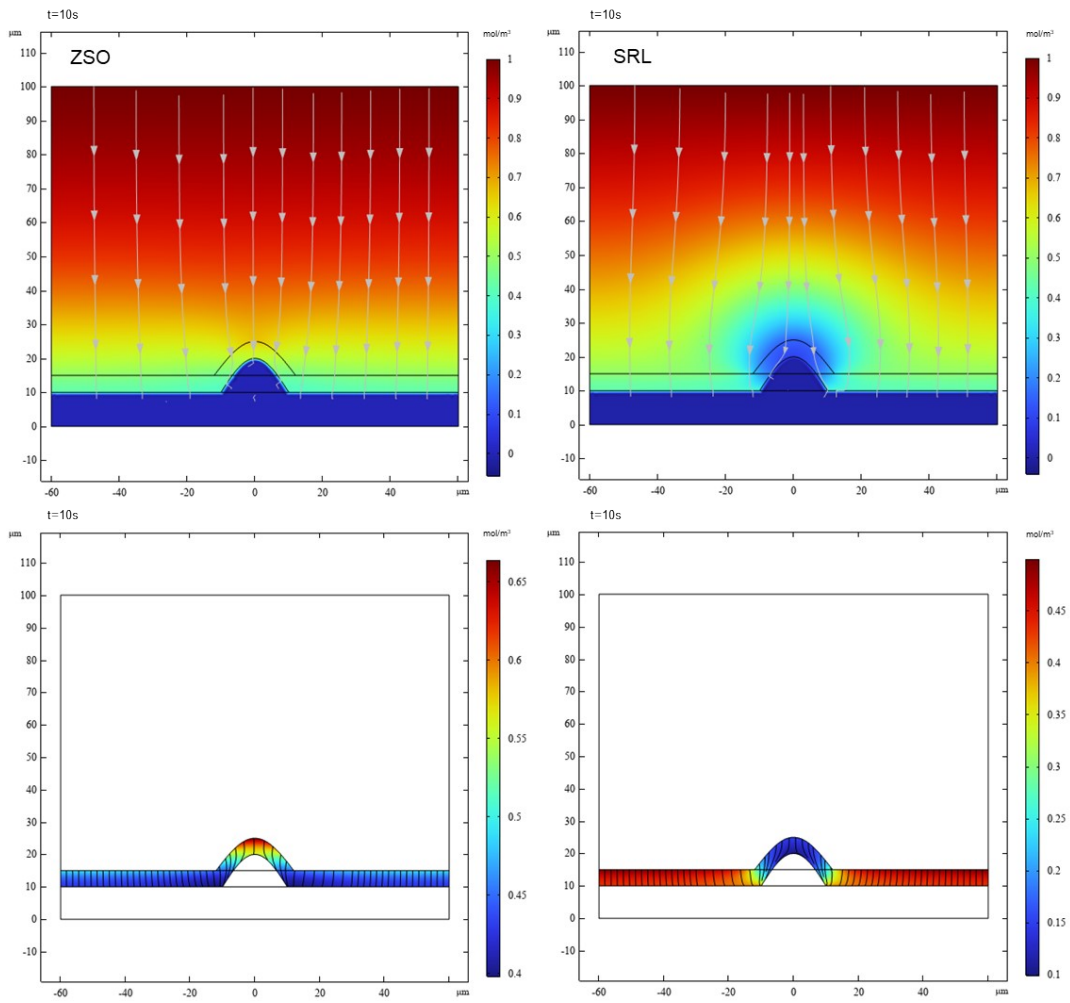

Fig. S6. COMSOL simulation of Zn electrode with or without sucralose during plating.

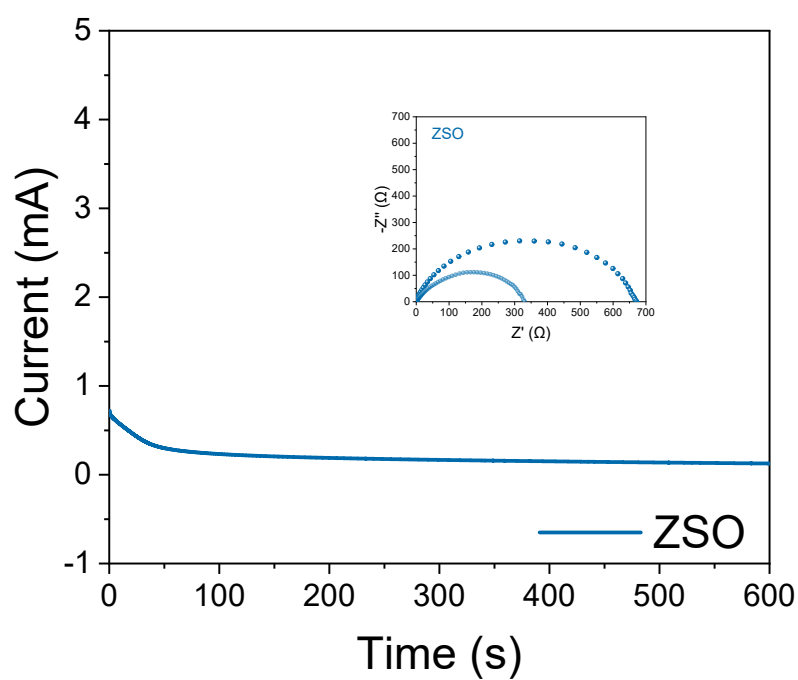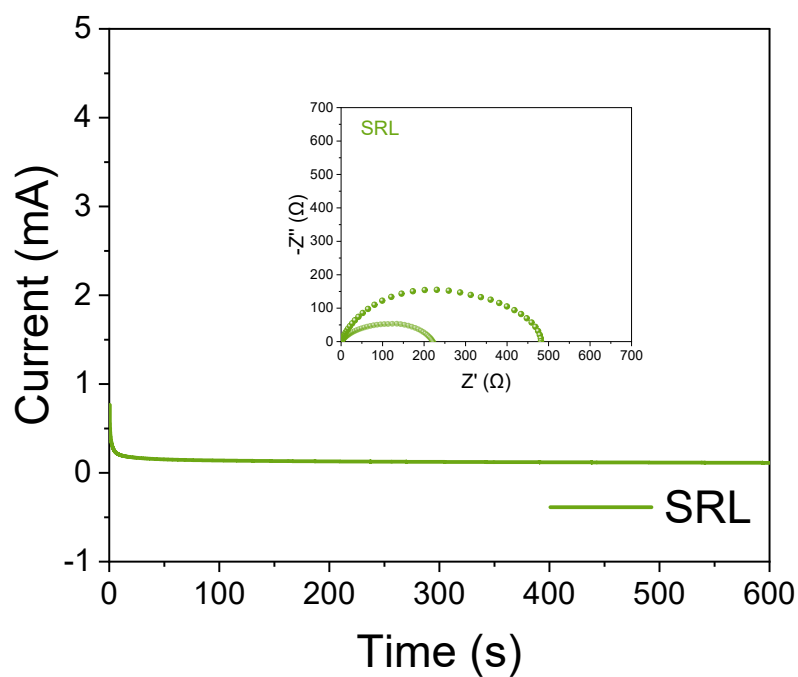

Fig. S7 CA curves of Zn||Zn cells without Et additive in electrolyte (the inset show corresponding Nyquist plots at the initial and steady states).

The  $\text{Zn}^{2+}$  transference number ( $t_{\text{Zn}^{2+}}$ ) was determined by following the classic electrochemical measurement. First, Zn||Zn battery was assembled. Second, electrochemical impedance spectroscopy was conducted to measure the initial resistance ( $R_0$ ) with a frequency range from 0.01 Hz to 100 KHz with an amplitude of -150 mV. The open-circuit potential was set as the initial voltage. Then, chronoamperometry was carried out with an overpotential of -150 mV for 600 s. The initial current ( $I_0$ ) and steady-state current ( $I_s$ ) were recorded. Lastly, electrochemical impedance

spectroscopy was conducted again to obtain the steady-state resistance ( $R_s$ ) under the same conditions.  $t_{Zn^{2+}}$  was determined by the following equation:

$$t_{Zn^{2+}} = \frac{I_s(\Delta V - I_0 R_0)}{I_0(\Delta V - I_s R_s)}$$

where  $\Delta V$  is the applied voltage (10 mV);  $I_0$  and  $R_0$  are the initial current and resistance, respectively; and  $I_s$  and  $R_s$  are the steady-state current and resistance, respectively. For glass fiber separator in ZSO, with  $I_0 = 0.765$  mA,  $R_0 = 330 \Omega$ ; and  $I_s = 0.113$  mA,  $R_s = 670 \Omega$ . Thus,  $t_{Zn^{2+}} = 0.53$ . However, for glass fiber separator in SRL, with  $I_0 = 0.721$  mA,  $R_0 = 220 \Omega$ ; and  $I_s = -0.126$  mA,  $R_s = 481 \Omega$ . Thus,  $t_{Zn^{2+}} = 0.57$

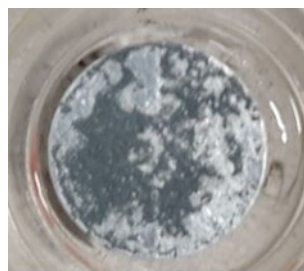

ZSO

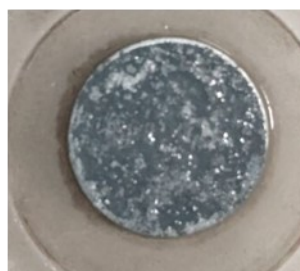

SRL

Fig. S8. Optical images of Zn anodes of Zn//Zn symmetric cell after cycling in ZSO and SRL electrolytes.

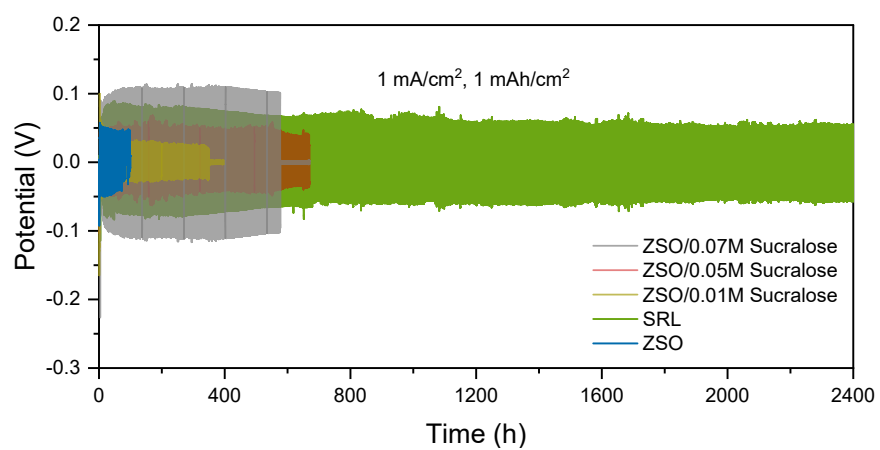

Fig. S9. Cycling performance of Zn//Zn symmetric cell in different concentration of SRL electrolyte at  $1 \text{ mA cm}^{-2}$  and  $1 \text{ mAh cm}^{-2}$ .

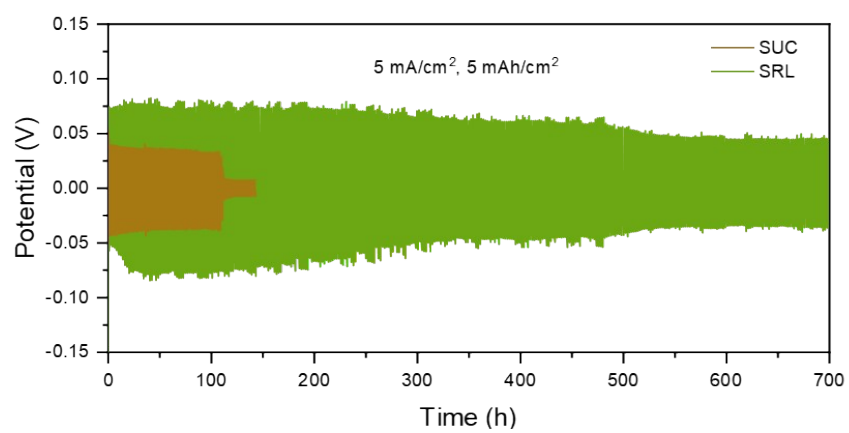

Fig. S10. Cycling performance of Zn//Zn symmetric cell in SUC electrolyte and SRL electrolyte at  $5 \text{ mA cm}^{-2}$  and  $5 \text{ mAh cm}^{-2}$ .

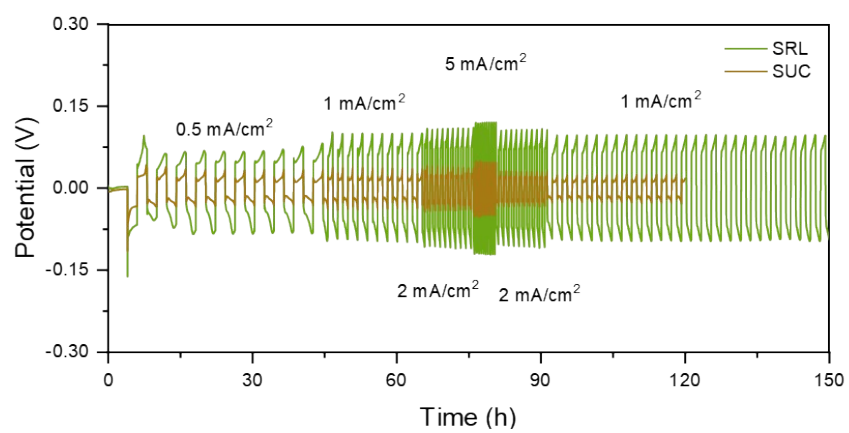

Fig. S11. The symmetric cell's rate performance in ZSO and SRL electrolytes.



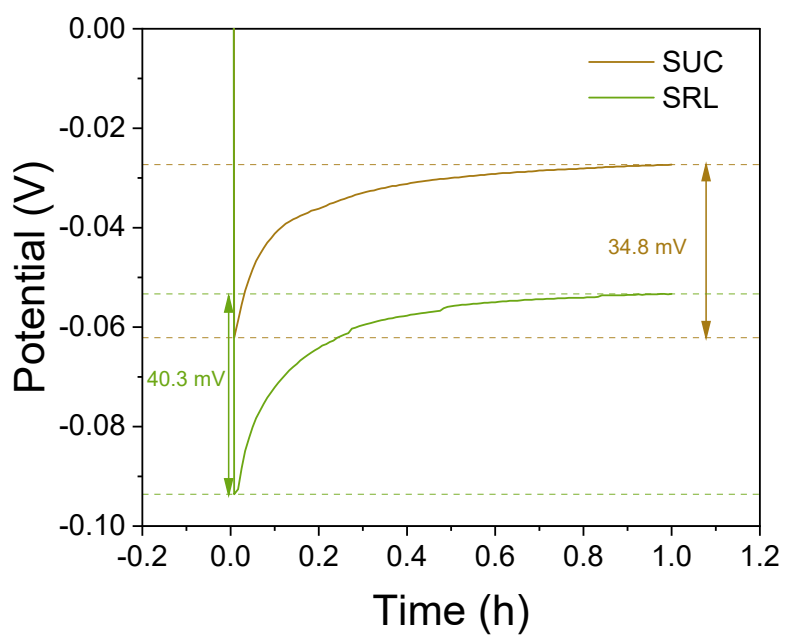

Fig. S12. The nucleation overpotential tested in SUC and SRL electrolyte using Zn//Cu cell at  $1 \text{ mA cm}^{-2}$  and  $0.5 \text{ mAh cm}^{-2}$ .

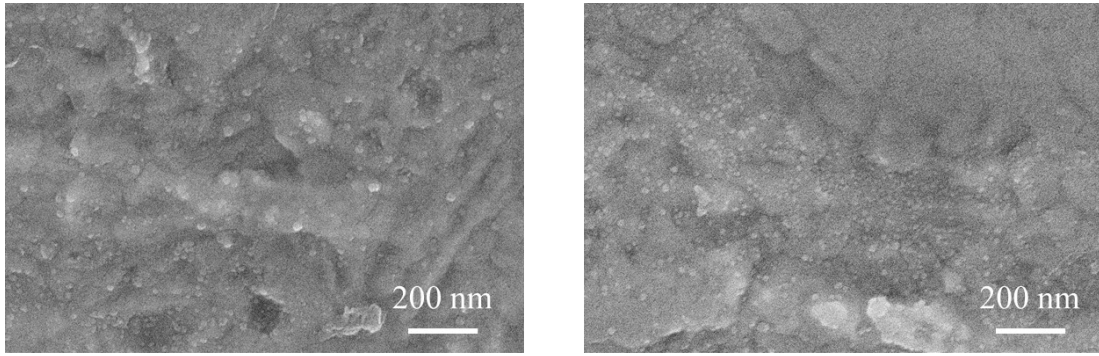

Fig. S13. SEM image of Zn<sup>2+</sup> nucleation.

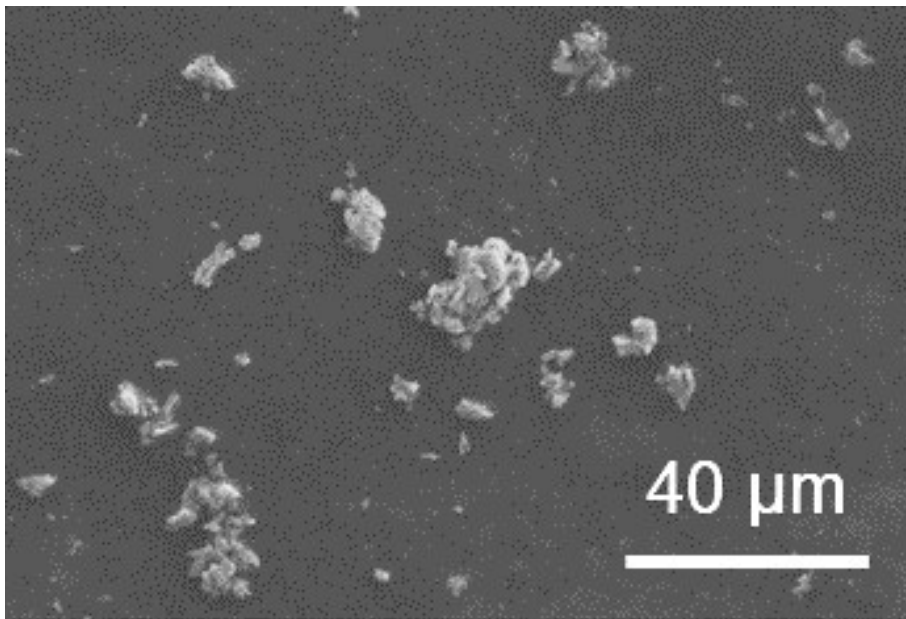

Fig. S14. SEM image of V<sub>2</sub>O<sub>5</sub> powder.

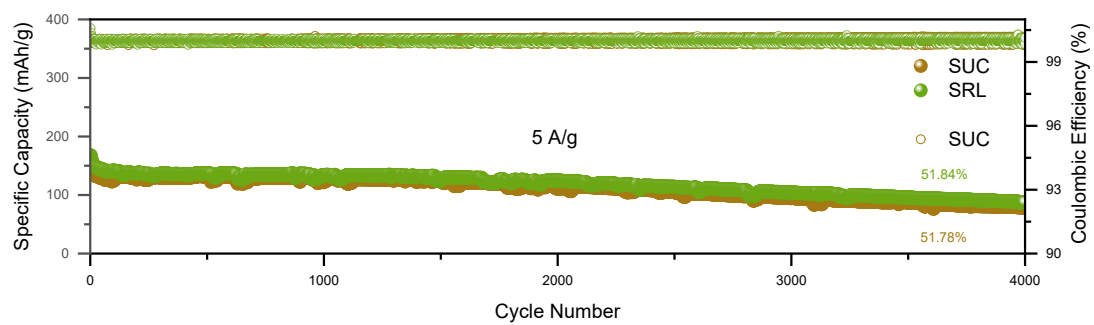

Fig. S15. Cycling performance at current density of 5 A/g of the Zn//V<sub>2</sub>O<sub>5</sub> full cell in SUC electrolyte and SRL electrolyte.

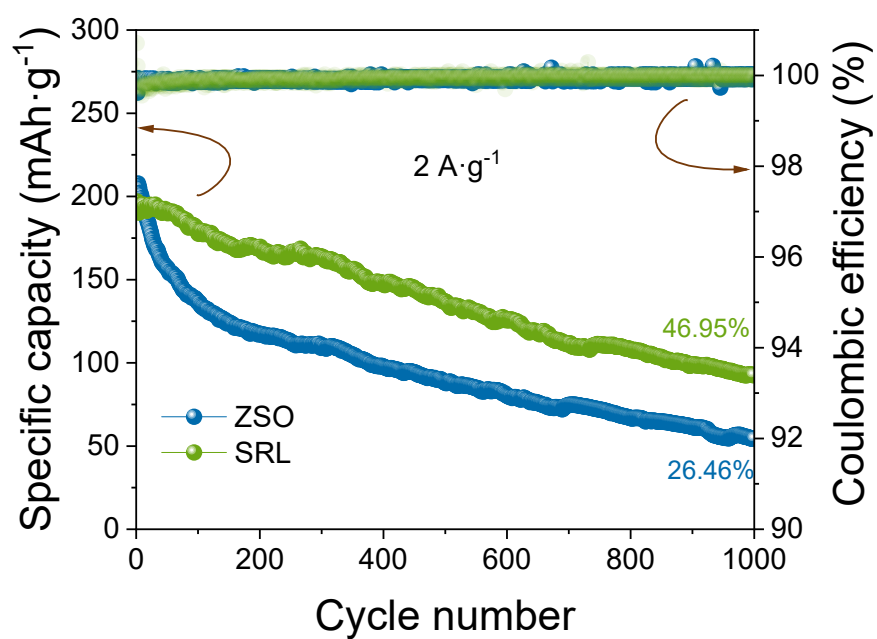

Fig. S16. Cycling performance at current density of 2 A/g of the Zn//V<sub>2</sub>O<sub>5</sub> full cell in ZSO electrolyte and SRL electrolyte.
